# Supplementary material
Source: PubMed Central journal article supplement (PMC4241155)
Supplement: NIHMS631713-supplement-Supplementary_Appendix.pdf [file NIHMS631713-supplement-Supplementary_Appendix.pdf]

# **SUPPLEMENTARY MATERIAL**

**American Heart Association's Get With The Guidelines<sup>®</sup> – Resuscitation (formerly National Registry of Cardiopulmonary Resuscitation) Investigators**

Besides the author Paul S. Chan, MD MSc, members of the Get With The Guidelines-Resuscitation Clinical Work Group and Adult Task Force include:

Steven Bradley, MD, MPH, University of Colorado; Michael W. Donnino, MD, Beth Israel Deaconess Medical Center; Dana P. Edelson, MD, MS, University of Chicago; Robert T. Faillace, MD, ScM, Geisinger Healthcare System; Romergryko Geocadin, MD, Johns Hopkins University School of Medicine; Raina Merchant, MD, MSHP, University of Pennsylvania School of Medicine; Vincent N. Mosesso, Jr., MD, University of Pittsburgh School of Medicine; Joseph P. Ornato, MD and Mary Ann Peberdy, MD, Virginia Commonwealth University; and Saket Girotra, University of Iowa.

**eTable 1.** Baseline Characteristics For Patients Matched and Not Matched to Medicare Files

| Characteristic                               | Patients Matched<br>(n = 6972) | Patients<br>Not Matched<br>(n = 3236) | Standardized<br>Difference* |
|----------------------------------------------|--------------------------------|---------------------------------------|-----------------------------|
| Demographic characteristics                  |                                |                                       |                             |
| Age — yr                                     | 75.8 ± 7.0                     | 75.2 ± 7.0                            | 9.1                         |
| Male sex, no. (%)                            | 3872 (55.5)                    | 1890 (58.4)                           | 5.8                         |
| Race, no. (%) <sup>†</sup>                   |                                |                                       |                             |
| White                                        | 5634 (85.7)                    | 2396 (82.8)                           | Reference                   |
| Black                                        | 778 (11.8)                     | 365 (12.6)                            | 2.4                         |
| Other                                        | 164 (2.5)                      | 132 (4.6)                             | 11.2                        |
| Cardiac arrest characteristics, no. (%)      |                                |                                       |                             |
| After hours (11:00 pm–6:59 am)               | 1763 (25.3)                    | 837 (26.3)                            | 1.4                         |
| Weekend                                      | 1908 (27.4)                    | 893 (27.6)                            | 0.5                         |
| Hospital-wide response activated             | 5432 (77.9)                    | 2556 (79.0)                           | 2.6                         |
| Use of automated external defibrillator      | 706 (10.1)                     | 340 (10.5)                            | 1.3                         |
| Initial cardiac arrest rhythm                |                                |                                       |                             |
| Asystole                                     | 1707 (24.5)                    | 865 (26.7)                            | Reference                   |
| Pulseless electrical activity                | 2031 (29.1)                    | 958 (29.6)                            | 1.0                         |
| Pulseless ventricular tachycardia            | 1109 (15.9)                    | 521 (16.1)                            | 0.5                         |
| Ventricular fibrillation                     | 2125 (30.5)                    | 892 (27.6)                            | 6.4                         |
| CPC score at discharge, no. (%) <sup>‡</sup> |                                |                                       |                             |
| 1 (mild to no neurological disability)       | 2943 (48.1)                    | 1277 (46.5)                           | Reference                   |
| 2 (moderate neurological disability)         | 2097 (34.3)                    | 902 (32.9)                            | 3.0                         |
| ≥3 (severe neurological disability or coma)  | 1074 (17.6)                    | 565 (20.6)                            | 7.7                         |

|                                                    |             |             |     |
|----------------------------------------------------|-------------|-------------|-----|
| Preexisting conditions, no. (%)                    |             |             |     |
| Acute stroke                                       | 249 (3.6)   | 115 (3.6)   | 0.1 |
| Baseline depression in CNS function                | 736 (10.6)  | 293 (9.1)   | 5.1 |
| Diabetes mellitus                                  | 2262 (32.4) | 1043 (32.2) | 0.5 |
| Heart failure during admission                     | 1625 (23.3) | 686 (21.2)  | 5.1 |
| Heart failure prior to admission                   | 1848 (26.5) | 800 (24.7)  | 4.1 |
| Hepatic insufficiency                              | 143 (2.1)   | 78 (2.4)    | 2.4 |
| Hypotension                                        | 1313 (18.8) | 588 (18.2)  | 1.7 |
| Major trauma                                       | 113 (1.6)   | 62 (1.9)    | 2.2 |
| Metabolic or electrolyte abnormality               | 770 (11.0)  | 364 (11.2)  | 0.7 |
| Metastatic or hematologic malignancy               | 518 (7.4)   | 222 (6.9)   | 2.2 |
| Myocardial infarction during admission             | 1897 (27.2) | 842 (26.0)  | 2.7 |
| Myocardial infarction prior to admission           | 1805 (25.9) | 742 (22.9)  | 6.9 |
| Pneumonia                                          | 725 (10.4)  | 291 (9.0)   | 4.8 |
| Renal insufficiency                                | 1836 (26.3) | 743 (23.0)  | 7.8 |
| Respiratory insufficiency                          | 2368 (34.0) | 1038 (32.1) | 4.0 |
| Septicemia                                         | 473 (6.8)   | 213 (6.6)   | 0.8 |
| Interventions in place, no. (%)                    |             |             |     |
| Mechanical ventilation                             | 1246 (17.9) | 564 (17.4)  | 1.2 |
| Dialysis                                           | 136 (2.0)   | 58 (1.8)    | 1.3 |
| Preexisting implantable cardioverter-defibrillator | 109 (1.6)   | 51 (1.6)    | 0.0 |

Abbreviations: CNS, central nervous system; and CPC, Cerebral Performance Category.

\* Due to the large sample size, a standardized difference of >10 was used to denote significant differences between groups

† Race was missing for 396 patients who matched and 343 patients who did not match.

‡ CPC score was missing for 858 patients who matched and 492 patients who did not match.

**eTable 2. Summary of Hospital Characteristics.\***

| <b>Site Characteristics</b>            | <b>Hospitals<br/>(N = 383)</b> |
|----------------------------------------|--------------------------------|
| <b>Number of Beds</b>                  |                                |
| <250                                   | 144 (37.6%)                    |
| 250-499                                | 162 (42.3%)                    |
| ≥500                                   | 77 (20.1%)                     |
| <b>Teaching Status</b>                 |                                |
| Major teaching (fellows and residents) | 70 (18.3%)                     |
| Minor teaching (residents only)        | 119 (31.1%)                    |
| Non-teaching                           | 194 (50.7%)                    |
| <b>Geographical Region</b>             |                                |
| Northeast                              | 49 (12.8%)                     |
| Southeast                              | 100 (26.1%)                    |
| North Central                          | 95 (24.8%)                     |
| South Central                          | 74 (19.3%)                     |
| West                                   | 65 (17.0%)                     |
| <b>Hospital Ownership</b>              |                                |
| Non-Profit                             | 277 (72.3%)                    |
| Public                                 | 48 (12.5%)                     |
| Private                                | 58 (15.1%)                     |
| Urban Hospital                         | 338 (88.3%)                    |

\* Information on hospital characteristics were obtained from the American Hospital Association and were missing for 18 hospitals.

**eTable 3. Principal Reasons for Index Hospitalization.** The primary diagnosis related groups (DRGs) for the index in-hospital cardiac arrest hospitalization are summarized.

|                                                | <b>N = 6972</b> | <b>%</b> |
|------------------------------------------------|-----------------|----------|
| <b>CARDIOVASCULAR</b>                          |                 |          |
| Heart failure                                  | 453             | 6.5%     |
| Coronary artery disease                        | 647             | 9.3%     |
| Myocardial infarction                          | 1428            | 20.5%    |
| Chest pain                                     | 62              | 0.9%     |
| Syncope                                        | 13              | 0.2%     |
| Cardiac arrest                                 | 127             | 1.8%     |
| Other cardiac                                  | 1072            | 15.4%    |
| <b>PULMONARY</b>                               |                 |          |
| Pneumonia                                      | 208             | 3.0%     |
| Acute Respiratory Failure                      | 336             | 4.8%     |
| COPD                                           | 91              | 1.3%     |
| Other Pulmonary                                | 226             | 3.2%     |
| <b>GASTROINTESTINAL</b>                        |                 |          |
| GI bleed                                       | 57              | 0.8%     |
| PUD, Liver, and Intestinal diseases            | 143             | 2.1%     |
| Other GI                                       | 190             | 2.7%     |
| <b>INFECTION</b>                               |                 |          |
| Sepsis                                         | 256             | 3.7%     |
| Bacteremia and other infections without sepsis | 31              | 0.4%     |
| <b>RENAL DISEASE</b>                           | 142             | 2.0%     |
| <b>MEDICAL / SURGICAL COMPLICATIONS</b>        | 212             | 3.0%     |
| <b>HEMATOLOGY / ONCOLOGY</b>                   |                 |          |
| Malignant Cancer                               | 253             | 3.6%     |
| Other cancers                                  | 17              | 0.2%     |
| Anemia and other hematologic                   | 21              | 0.3%     |
| <b>NEUROLOGICAL</b>                            |                 |          |
| Stroke                                         | 201             | 2.9%     |
| Other Neurological                             | 46              | 0.7%     |
| <b>DIABETES AND OTHER ENDOCRINE</b>            | 66              | 0.9%     |
| <b>DEHYDRATION AND ELECTROLYTES</b>            | 55              | 0.8%     |
| <b>FRACTURE AND OTHER MUSCULOSKELETAL</b>      | 85              | 1.2%     |
| <b>INJURY OR POISONING</b>                     | 196             | 2.8%     |
| <b>PSYCHIATRIC</b>                             | 7               | 0.1%     |
| <b>ALL OTHER CAUSES</b>                        | 331             | 4.7%     |

**eTable 4. Cost of Index Hospitalization for In-Hospital Cardiac Arrest by Subgroups**

|                                   | <b>Adjusted<br/>Costs</b> | <b>Cost Ratio<br/>(95% CI)</b> | <b>P</b>  |
|-----------------------------------|---------------------------|--------------------------------|-----------|
| <b>ALL PATIENTS</b>               | \$35,808                  |                                |           |
| <b>AGE GROUPS</b>                 |                           |                                |           |
| 65 to 74                          | \$37,072                  | 1.46 (1.33-1.59)               | <0.001    |
| 75 to 84                          | \$32,502                  | 1.28 (1.18-1.39)               | <0.001    |
| ≥ 85                              | \$25,392                  | Reference                      | Reference |
| <b>SEX</b>                        |                           |                                |           |
| Men                               | \$37,392                  | Reference                      | Reference |
| Women                             | \$34,775                  | 0.93 (0.89-0.98)               | 0.007     |
| <b>RACE GROUPS</b>                |                           |                                |           |
| White                             | \$35,022                  | Reference                      | Reference |
| Black                             | \$35,022                  | 1.00 (0.92-1.10)               | 0.95      |
| Other                             | \$35,722                  | 1.02 (0.83-1.26)               | 0.86      |
| <b>INITIAL RHYTHM</b>             |                           |                                |           |
| Pulseless electrical activity     | \$39,512                  | Reference                      | Reference |
| Asystole                          | \$40,302                  | 1.02 (0.96-1.09)               | 0.49      |
| Ventricular fibrillation          | \$33,190                  | 0.84 (0.78-0.90)               | <0.001    |
| Pulseless ventricular tachycardia | \$34,375                  | 0.87 (0.80-0.94)               | <0.001    |
| <b>NEUROLOGICAL STATUS</b>        |                           |                                |           |
| Mild to no disability             | \$30,735                  | Reference                      | Reference |
| Moderate disability               | \$33,194                  | 1.08 (1.02-1.15)               | 0.008     |
| Severe disability                 | \$37,804                  | 1.23 (1.13-1.34)               | <0.001    |
| Coma or vegetative state          | \$39,956                  | 1.30 (1.10-1.54)               | 0.002     |
